# Supplementary material for: Novel biodegradable low-κ dielectric nanomaterials from natural polyphenols
Source: Royal Society of Chemistry journal article supplement (doi:10.1039/d1ra01513c), 2021-01-01
Supplement: d1ra01513c1.pdf [file d1ra01513c1.pdf]

Supporting Information

## Novel Biodegradable Low- $\kappa$ Dielectric Nanomaterials from Natural Polyphenol

Sujoy Saha,<sup>a</sup> Sheeba Dawood,<sup>a</sup> Pravalika Butreddy,<sup>a</sup> Gayani Pathiraja,<sup>a</sup> and Hemali Rathnayake<sup>\*a</sup>

<sup>\*a</sup>Department of Nanoscience, Joint School of Nanoscience and Nanoengineering,  
University of North Carolina at Greensboro, Greensboro NC 27401

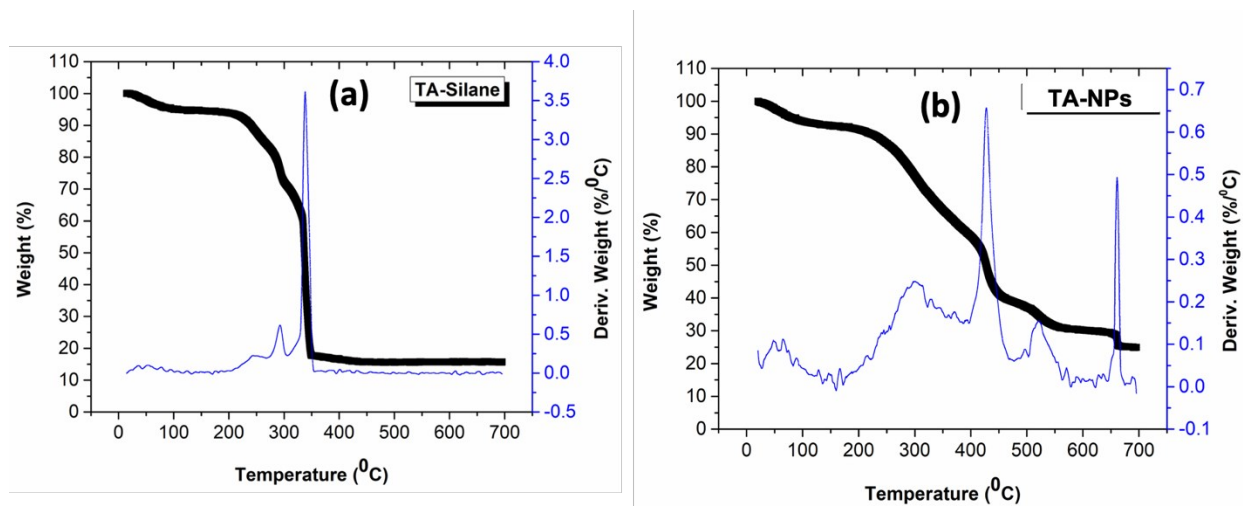

Figure S1: TGA graphs for (a) TA-silane, and (b) TA-NPs.

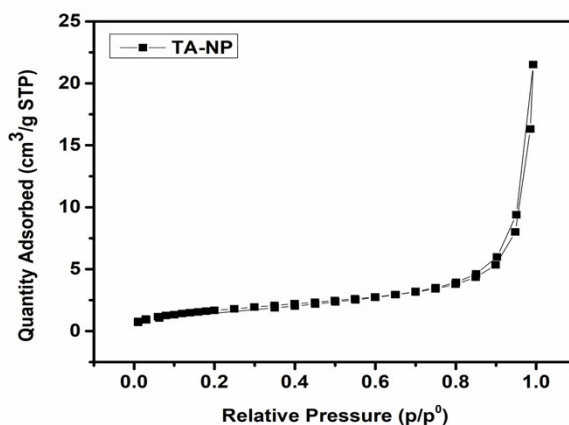

Figure S2: BET Isotherm of TA-NPs.

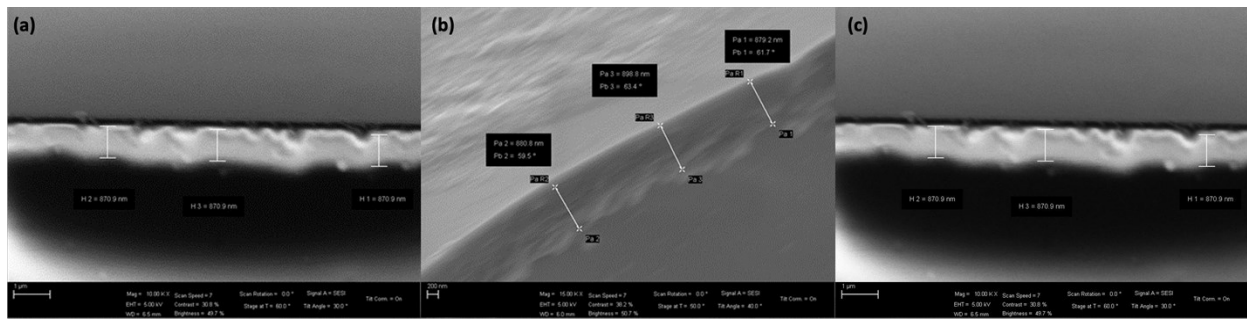

**Figure S3:** SEM images of thin film cross-sections for (a) tannic acid, (b) TA-silane, and (c) TA-NPs.
